# Supplementary material
Source: MDPI journal article supplement (https://www.mdpi.com/2073-4352/2/1/110)
Supplement: s1 [file s1]

 
data_bt147a 
 
_audit_creation_method            SHELXL-97 
_chemical_name_systematic 
; 
 ? 
; 
_chemical_name_common             ? 
_chemical_melting_point           ? 
_chemical_formula_moiety          ? 
_chemical_formula_sum 
 'C10 H24 Cl5 Fe N2 O4' 
_chemical_formula_weight          469.42 
 
loop_ 
 _atom_type_symbol 
 _atom_type_description 
 _atom_type_scat_dispersion_real 
 _atom_type_scat_dispersion_imag 
 _atom_type_scat_source 
 'C'  'C'   0.0033   0.0016 
 'International Tables Vol C Tables 4.2.6.8 and 6.1.1.4' 
 'Cl'  'Cl'   0.1484   0.1585 
 'International Tables Vol C Tables 4.2.6.8 and 6.1.1.4' 
 'Fe'  'Fe'   0.3463   0.8444 
 'International Tables Vol C Tables 4.2.6.8 and 6.1.1.4' 
 'N'  'N'   0.0061   0.0033 
 'International Tables Vol C Tables 4.2.6.8 and 6.1.1.4' 
 'O'  'O'   0.0106   0.0060 
 'International Tables Vol C Tables 4.2.6.8 and 6.1.1.4' 
 'H'  'H'   0.0000   0.0000 
 'International Tables Vol C Tables 4.2.6.8 and 6.1.1.4' 
 
_symmetry_cell_setting            ? 
_symmetry_space_group_name_H-M    'p_b_c_m'
 
loop_ 
 _symmetry_equiv_pos_as_xyz 
 'x, y, z' 
 '-x, -y, z+1/2' 
 'x, -y+1/2, -z' 
 '-x, y+1/2, -z+1/2' 
 '-x, -y, -z' 
 'x, y, -z-1/2' 
 '-x, y-1/2, z' 
 'x, -y-1/2, z-1/2' 
 
_cell_length_a                    6.2717(13) 
_cell_length_b                    12.841(3) 
_cell_length_c                    25.693(5) 
_cell_angle_alpha                 90.00 
_cell_angle_beta                  90.00 
_cell_angle_gamma                 90.00 
_cell_volume                      2069.2(8) 
_cell_formula_units_Z             4 
_cell_measurement_temperature     293(2) 
_cell_measurement_reflns_used     ? 
_cell_measurement_theta_min       ? 
_cell_measurement_theta_max       ? 
 
_exptl_crystal_description        'plate shaped' 
_exptl_crystal_colour             brown 
_exptl_crystal_size_max           0.4 
_exptl_crystal_size_mid           0.2 
_exptl_crystal_size_min           0.1 
_exptl_crystal_density_meas       ? 
_exptl_crystal_density_diffrn     1.507 
_exptl_crystal_density_method     'not measured' 
_exptl_crystal_F_000              964 
_exptl_absorpt_coefficient_mu     1.388 
_exptl_absorpt_correction_type    none 
_exptl_absorpt_correction_T_min   ? 
_exptl_absorpt_correction_T_max   ? 
_exptl_absorpt_process_details    ? 
 
_exptl_special_details 
; 
 ? 
; 
 
_diffrn_ambient_temperature       293(2) 
_diffrn_radiation_wavelength      0.71073 
_diffrn_radiation_type            MoK\a 
_diffrn_radiation_source          'fine-focus sealed tube' 
_diffrn_radiation_monochromator   graphite 
_diffrn_measurement_device_type   ? 
_diffrn_measurement_method        ? 
_diffrn_detector_area_resol_mean  ? 
_diffrn_standards_number          ? 
_diffrn_standards_interval_count  ? 
_diffrn_standards_interval_time   ? 
_diffrn_standards_decay_%         ? 
_diffrn_reflns_number             11322 
_diffrn_reflns_av_R_equivalents   0.1013 
_diffrn_reflns_av_sigmaI/netI     0.1027 
_diffrn_reflns_limit_h_min        -7 
_diffrn_reflns_limit_h_max        7 
_diffrn_reflns_limit_k_min        -15 
_diffrn_reflns_limit_k_max        15 
_diffrn_reflns_limit_l_min        -29 
_diffrn_reflns_limit_l_max        29 
_diffrn_reflns_theta_min          3.25 
_diffrn_reflns_theta_max          25.00 
_reflns_number_total              1680 
_reflns_number_gt                 889 
_reflns_threshold_expression      >2sigma(I) 
 
_computing_data_collection        ? 
_computing_cell_refinement        ? 
_computing_data_reduction         ? 
_computing_structure_solution     'SHELXS-97 (Sheldrick, 1990)' 
_computing_structure_refinement   'SHELXL-97 (Sheldrick, 1997)' 
_computing_molecular_graphics     ? 
_computing_publication_material   ? 
 
_refine_special_details 
; 
 Refinement of F^2^ against ALL reflections.  The weighted R-factor wR and 
 goodness of fit S are based on F^2^, conventional R-factors R are based 
 on F, with F set to zero for negative F^2^. The threshold expression of 
 F^2^ > 2sigma(F^2^) is used only for calculating R-factors(gt) etc. and is 
 not relevant to the choice of reflections for refinement.  R-factors based 
 on F^2^ are statistically about twice as large as those based on F, and R- 
 factors based on ALL data will be even larger. 
; 
 
_refine_ls_structure_factor_coef  Fsqd  
_refine_ls_matrix_type            full 
_refine_ls_weighting_scheme       calc  
_refine_ls_weighting_details 
 'calc w=1/[\s^2^(Fo^2^)+(0.0291P)^2^+0.0000P] where P=(Fo^2^+2Fc^2^)/3' 
_atom_sites_solution_primary      direct 
_atom_sites_solution_secondary    difmap 
_atom_sites_solution_hydrogens    geom 
_refine_ls_hydrogen_treatment     constr 
_refine_ls_extinction_method      SHELXL 
_refine_ls_extinction_coef        0.0011(3) 
_refine_ls_extinction_expression 
 'Fc^*^=kFc[1+0.001xFc^2^\l^3^/sin(2\q)]^-1/4^' 
_refine_ls_number_reflns          1680 
_refine_ls_number_parameters      109 
_refine_ls_number_restraints      0 
_refine_ls_R_factor_all           0.0813 
_refine_ls_R_factor_gt            0.0393 
_refine_ls_wR_factor_ref          0.0818 
_refine_ls_wR_factor_gt           0.0752 
_refine_ls_goodness_of_fit_ref    0.80 
_refine_ls_restrained_S_all       0.80 
_refine_ls_shift/su_max           0.000 
_refine_ls_shift/su_mean          0.000 
 
loop_ 
 _atom_site_label 
 _atom_site_type_symbol 
 _atom_site_fract_x 
 _atom_site_fract_y 
 _atom_site_fract_z 
 _atom_site_U_iso_or_equiv 
 _atom_site_adp_type 
 _atom_site_occupancy 
 _atom_site_symmetry_multiplicity 
 _atom_site_calc_flag 
 _atom_site_refinement_flags 
 _atom_site_disorder_assembly 
 _atom_site_disorder_group 
Fe1 Fe 0.98602(16) 0.40833(8) 0.2500 0.0289(3) Uani 1 2 d S . . 
O1 O 0.6223(6) -0.0766(3) 0.06160(13) 0.0412(8) Uani 1 1 d . . . 
O2 O 0.9774(6) -0.0502(3) 0.05815(12) 0.0404(8) Uani 1 1 d . . . 
H2 H 0.9770 -0.1064 0.0429 0.061 Uiso 1 1 calc R . . 
N1 N 0.5746(6) 0.1263(3) 0.11032(15) 0.0307(9) Uani 1 1 d . . . 
C1 C 0.4477(8) 0.0619(5) 0.1484(2) 0.0443(13) Uani 1 1 d . . . 
H1A H 0.4022 -0.0013 0.1319 0.066 Uiso 1 1 calc R . . 
H1B H 0.3251 0.1007 0.1596 0.066 Uiso 1 1 calc R . . 
H1C H 0.5350 0.0455 0.1780 0.066 Uiso 1 1 calc R . . 
C2 C 0.6212(9) 0.2304(4) 0.1342(2) 0.0455(13) Uani 1 1 d . . . 
H2A H 0.7156 0.2216 0.1632 0.068 Uiso 1 1 calc R . . 
H2B H 0.4906 0.2616 0.1458 0.068 Uiso 1 1 calc R . . 
H2C H 0.6873 0.2746 0.1087 0.068 Uiso 1 1 calc R . . 
C3 C 0.4456(7) 0.1438(5) 0.06197(18) 0.0421(12) Uani 1 1 d . . . 
H3A H 0.5274 0.1840 0.0376 0.063 Uiso 1 1 calc R . . 
H3B H 0.3175 0.1809 0.0707 0.063 Uiso 1 1 calc R . . 
H3C H 0.4093 0.0779 0.0467 0.063 Uiso 1 1 calc R . . 
C4 C 0.7857(7) 0.0770(4) 0.09881(17) 0.0298(10) Uani 1 1 d . . . 
H4A H 0.8682 0.1254 0.0779 0.036 Uiso 1 1 calc R . . 
H4B H 0.8609 0.0678 0.1315 0.036 Uiso 1 1 calc R . . 
C5 C 0.7812(8) -0.0253(4) 0.07124(17) 0.0345(11) Uani 1 1 d . . . 
Cl2 Cl 0.6404(2) 0.38653(15) 0.2500 0.0385(4) Uani 1 2 d S . . 
Cl1 Cl 1.11528(18) 0.33841(12) 0.17907(4) 0.0405(3) Uani 1 1 d . . . 
Cl3 Cl 1.0596(3) 0.57643(14) 0.2500 0.0473(5) Uani 1 2 d S . . 
Cl4 Cl 0.9544(3) 0.2500 0.0000 0.0327(4) Uani 1 2 d S . . 
 
loop_ 
 _atom_site_aniso_label 
 _atom_site_aniso_U_11 
 _atom_site_aniso_U_22 
 _atom_site_aniso_U_33 
 _atom_site_aniso_U_23 
 _atom_site_aniso_U_13 
 _atom_site_aniso_U_12 
Fe1 0.0287(5) 0.0336(5) 0.0243(5) 0.000 0.000 -0.0017(4) 
O1 0.0418(19) 0.037(2) 0.045(2) -0.0060(15) -0.0027(14) -0.0071(17) 
O2 0.044(2) 0.0377(17) 0.039(2) -0.0066(14) 0.0089(15) 0.0010(16) 
N1 0.0269(18) 0.036(2) 0.029(2) 0.0002(15) -0.0021(13) -0.0022(14) 
C1 0.033(3) 0.058(4) 0.042(3) 0.009(2) 0.0101(19) -0.006(2) 
C2 0.039(3) 0.042(3) 0.055(3) -0.012(2) -0.003(2) 0.007(2) 
C3 0.039(3) 0.054(3) 0.034(3) 0.008(2) -0.0145(18) 0.004(2) 
C4 0.024(2) 0.033(3) 0.032(3) -0.0019(18) 0.0011(16) 0.0016(19) 
C5 0.048(3) 0.034(3) 0.022(3) 0.0059(17) 0.0010(19) 0.007(2) 
Cl2 0.0302(9) 0.0534(11) 0.0320(9) 0.000 0.000 0.0022(7) 
Cl1 0.0354(6) 0.0539(7) 0.0323(6) -0.0056(5) 0.0079(4) -0.0005(6) 
Cl3 0.0644(13) 0.0337(10) 0.0437(11) 0.000 0.000 -0.0093(8) 
Cl4 0.0370(8) 0.0297(8) 0.0314(8) -0.0001(7) 0.000 0.000 
 
_geom_special_details 
; 
 All esds (except the esd in the dihedral angle between two l.s. planes) 
 are estimated using the full covariance matrix.  The cell esds are taken 
 into account individually in the estimation of esds in distances, angles 
 and torsion angles; correlations between esds in cell parameters are only 
 used when they are defined by crystal symmetry.  An approximate (isotropic) 
 treatment of cell esds is used for estimating esds involving l.s. planes. 
; 
 
loop_ 
 _geom_bond_atom_site_label_1 
 _geom_bond_atom_site_label_2 
 _geom_bond_distance 
 _geom_bond_site_symmetry_2 
 _geom_bond_publ_flag 
Fe1 Cl2 2.1854(19) . ? 
Fe1 Cl1 2.1873(13) 6_556 ? 
Fe1 Cl1 2.1873(13) . ? 
Fe1 Cl3 2.207(2) . ? 
O1 C5 1.220(6) . ? 
O2 C5 1.315(6) . ? 
N1 C4 1.497(5) . ? 
N1 C2 1.499(7) . ? 
N1 C3 1.499(6) . ? 
N1 C1 1.508(6) . ? 
C4 C5 1.494(7) . ? 
 
loop_ 
 _geom_angle_atom_site_label_1 
 _geom_angle_atom_site_label_2 
 _geom_angle_atom_site_label_3 
 _geom_angle 
 _geom_angle_site_symmetry_1 
 _geom_angle_site_symmetry_3 
 _geom_angle_publ_flag 
Cl2 Fe1 Cl1 108.36(5) . 6_556 ? 
Cl2 Fe1 Cl1 108.36(5) . . ? 
Cl1 Fe1 Cl1 112.84(8) 6_556 . ? 
Cl2 Fe1 Cl3 109.42(8) . . ? 
Cl1 Fe1 Cl3 108.91(5) 6_556 . ? 
Cl1 Fe1 Cl3 108.91(5) . . ? 
C4 N1 C2 106.6(4) . . ? 
C4 N1 C3 112.1(4) . . ? 
C2 N1 C3 108.1(4) . . ? 
C4 N1 C1 111.3(4) . . ? 
C2 N1 C1 109.0(4) . . ? 
C3 N1 C1 109.6(4) . . ? 
C5 C4 N1 116.7(4) . . ? 
O1 C5 O2 125.5(5) . . ? 
O1 C5 C4 125.9(4) . . ? 
O2 C5 C4 108.5(4) . . ? 
 
_diffrn_measured_fraction_theta_max    0.896 
_diffrn_reflns_theta_full              25.00 
_diffrn_measured_fraction_theta_full   0.896 
_refine_diff_density_max    0.354 
_refine_diff_density_min   -0.510 
_refine_diff_density_rms    0.075 
